# Supplementary material for: The prevalence of repeating fast radio bursts
Source: Springer Nature journal article supplement (doi:10.1038/s41550-019-0831-y), 2019-07-15
Supplement: MOESM1 [file 41550_2019_831_MOESM1_ESM.pdf]

In the format provided by the authors and unedited.

# The prevalence of repeating fast radio bursts

Vikram Ravi <sup>1,2</sup>

---

<sup>1</sup>Center for Astrophysics, Harvard & Smithsonian, Cambridge, MA, USA. <sup>2</sup>Cahill Center for Astronomy and Astrophysics, California Institute of Technology, Pasadena, CA, USA. e-mail: [vikram@caltech.edu](mailto:vikram@caltech.edu)

# Supplementary Information: The prevalence of repeating fast radio bursts

Vikram Ravi<sup>1,2,3,\*</sup>.

<sup>1</sup> Center for Astrophysics | Harvard & Smithsonian, 60 Garden Street, Cambridge MA 02138, USA.

<sup>2</sup> Cahill Center for Astronomy and Astrophysics, MC 249-17, California Institute of Technology, Pasadena CA 91125, USA.

<sup>3</sup> E-mail: vikram@caltech.edu.

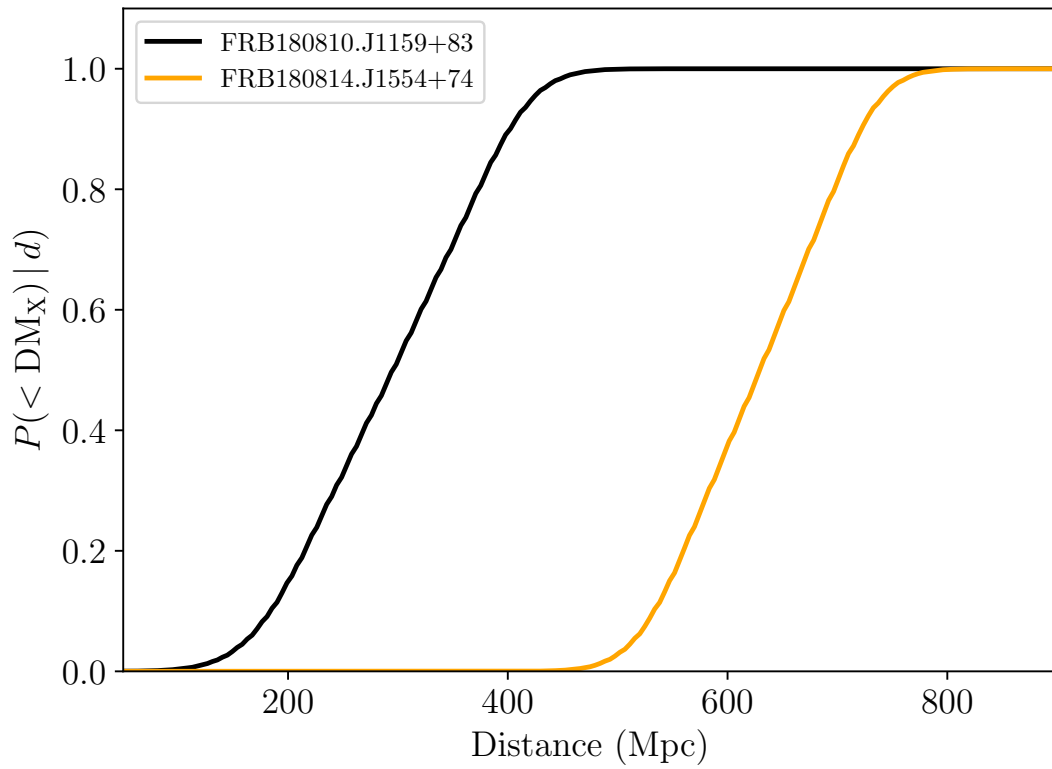

**Supplementary Figure 1: Probabilities of FRBs 180810.J1159+83 and 180814.J1554+74 having DMs consistent with originating within various distances.** The curves show evaluations of the probability distribution  $P(< DM_X | d)$  referred to in the main text.

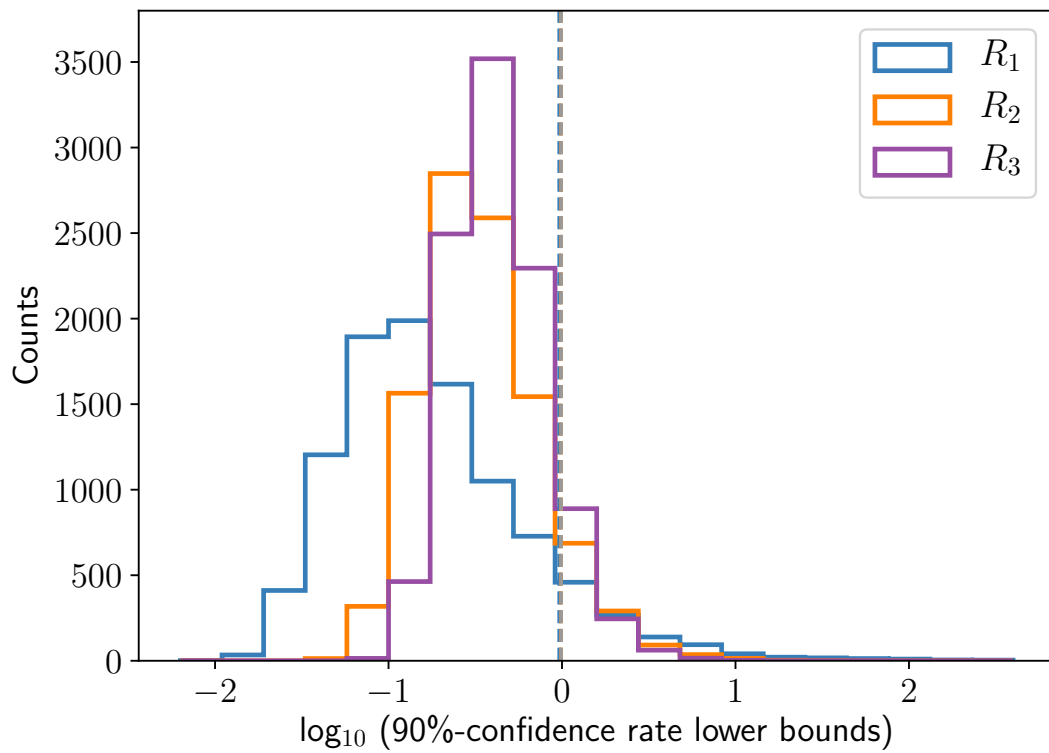

**Supplementary Figure 2: Histograms of 90%-confidence lower-limit estimates of the occurrence rate of simulated FRB samples (see Methods).** The true rate in each case was unity. The overlapping vertical dashed lines indicate the 90th percentiles of the distributions.
